# Supplementary material for: The proportion of randomized controlled trials that inform clinical practice
Source: eLife journal article supplement (doi:10.7554/elife.79491), 2022-08-17
Supplement: supp [file elife-79491-supp-v1.zip]

Archive with 23 entries (23 files):
- elife_poa_e79491_Figure_2_figure_supplement_1.pdf
- elife_poa_e79491_Figure_3_figure_supplement_1.pdf
- elife_poa_e79491_Figure_3_figure_supplement_2.pdf
- elife_poa_e79491_Figure_3_figure_supplement_3.pdf
- elife_poa_e79491_Supplementary_file_1.docx
- elife_poa_e79491_Supplementary_file_2.docx
- elife_poa_e79491_Supplementary_file_3.docx
- elife_poa_e79491_Supplementary_file_4.docx
- elife_poa_e79491_Supplementary_file_5.docx
- elife_poa_e79491_Supplementary_file_6.docx
- elife_poa_e79491_Supplementary_file_7.docx
- elife_poa_e79491_Supplementary_file_8.docx
- elife_poa_e79491_Supplementary_file_9.docx
- elife_poa_e79491_Supplementary_file_10.docx
- elife_poa_e79491_Supplementary_file_11.docx
- elife_poa_e79491_Supplementary_file_12.docx
- elife_poa_e79491_Supplementary_file_13.docx
- elife_poa_e79491_Supplementary_file_14.docx
- elife_poa_e79491_Supplementary_file_15.docx
- elife_poa_e79491_Supplementary_file_16.docx
- elife_poa_e79491_Supplementary_file_17.docx
- elife_poa_e79491_Supplementary_file_18.docx
- elife_poa_e79491_Supplementary_file_19.docx
