# Supplementary material for: The proportion of randomized controlled trials that inform clinical practice
Source: eLife journal article supplement (doi:10.7554/elife.79491), 2022-08-17
Supplement: supp [file elife-79491-supp-v1.zip › elife_poa_e79491_Supplementary_file_17.docx]

**Supplementary File 17 –** **Inter-rater Agreement Rates**

| **Category** | **Unweighted Cohen’s Kappa** |
| --- | --- |
| Screening trials for inclusion/exclusion | 0.83 |
| Evaluating trial Feasibility | 0.98 |
| Evaluating trial Reporting | 0.79 |
| Evaluating trial Importance | 0.67 |
| Evaluating trial Design | 0.84 |
