# Supplementary figures and images for: The proportion of randomized controlled trials that inform clinical practice
Source: eLife journal article supplement (doi:10.7554/elife.79491), 2022-08-17

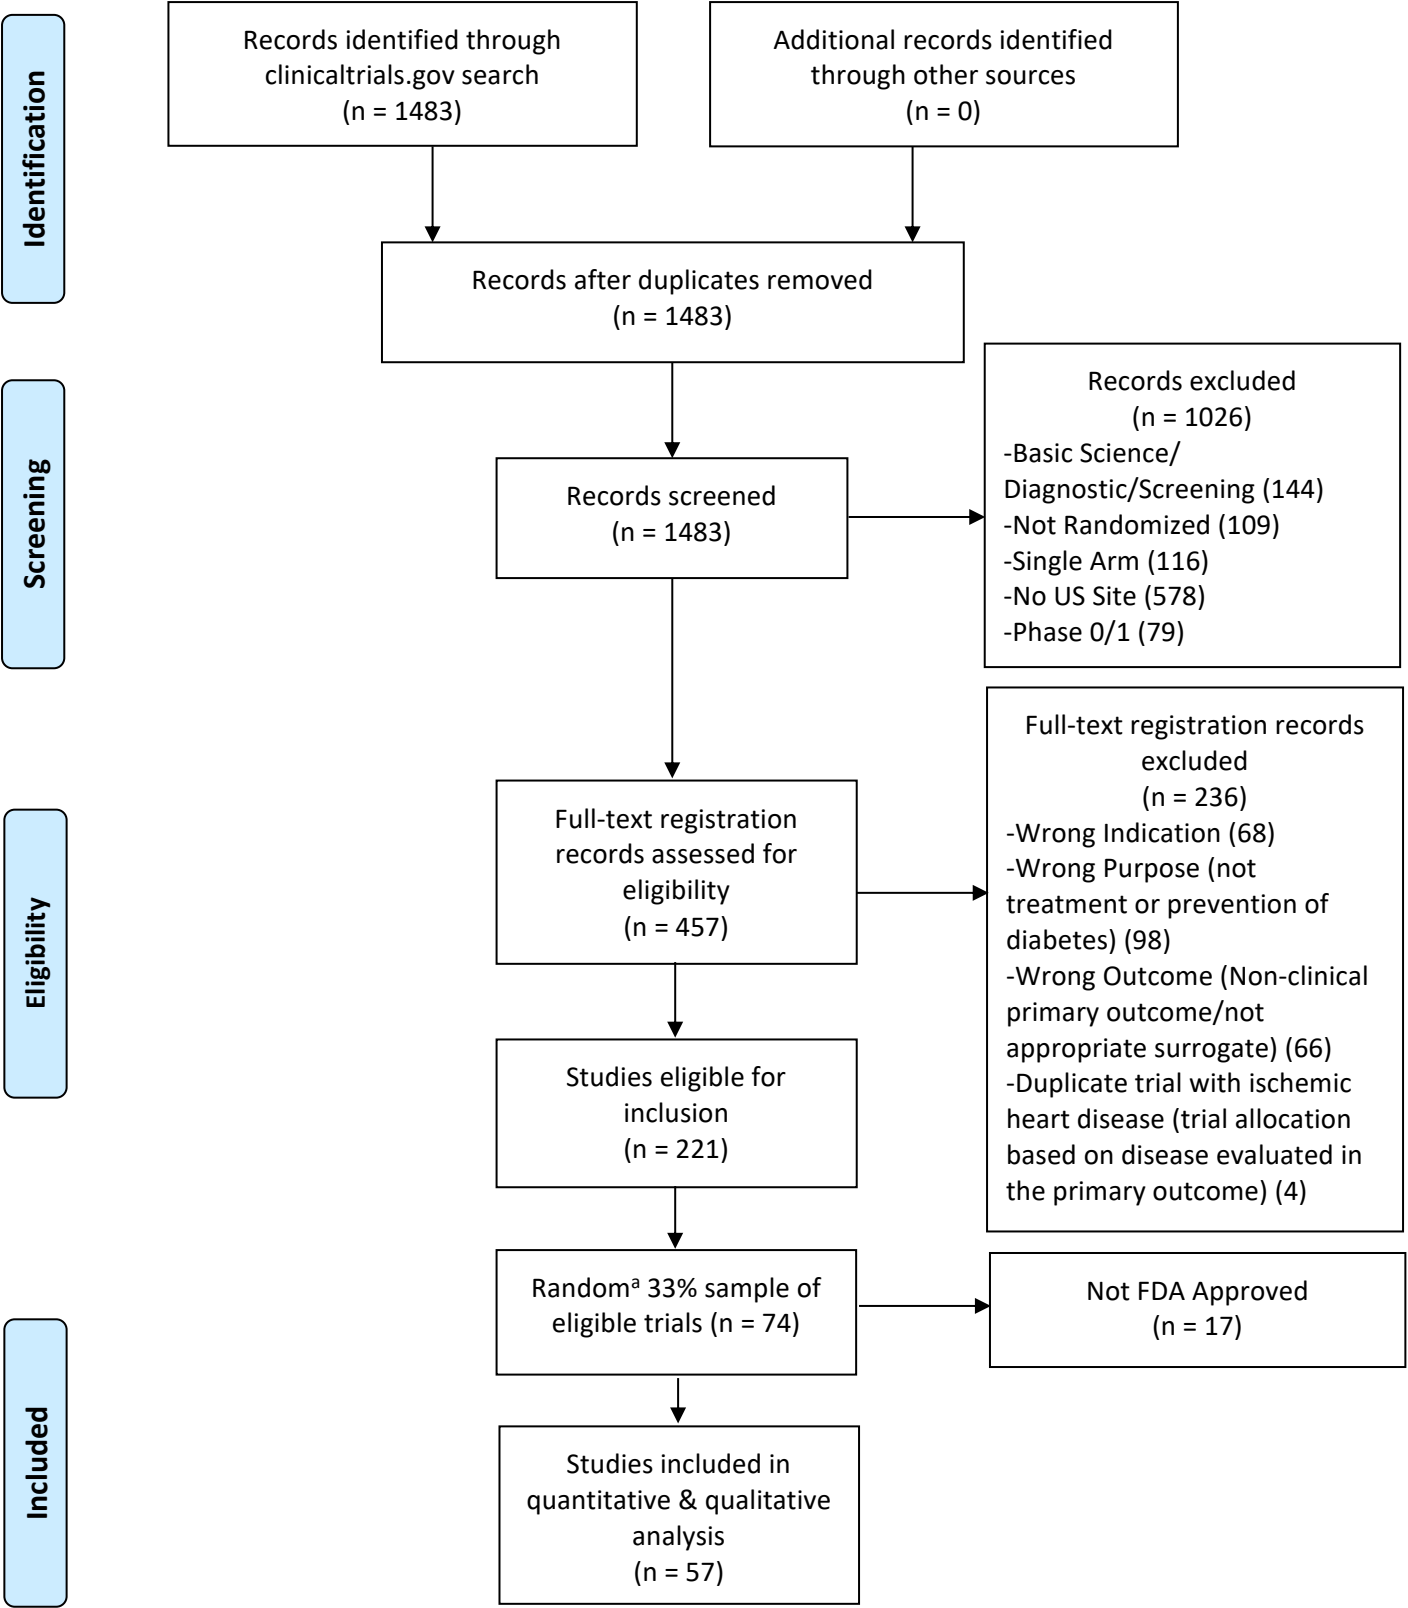

Supplement: supp [file elife-79491-supp-v1.zip]

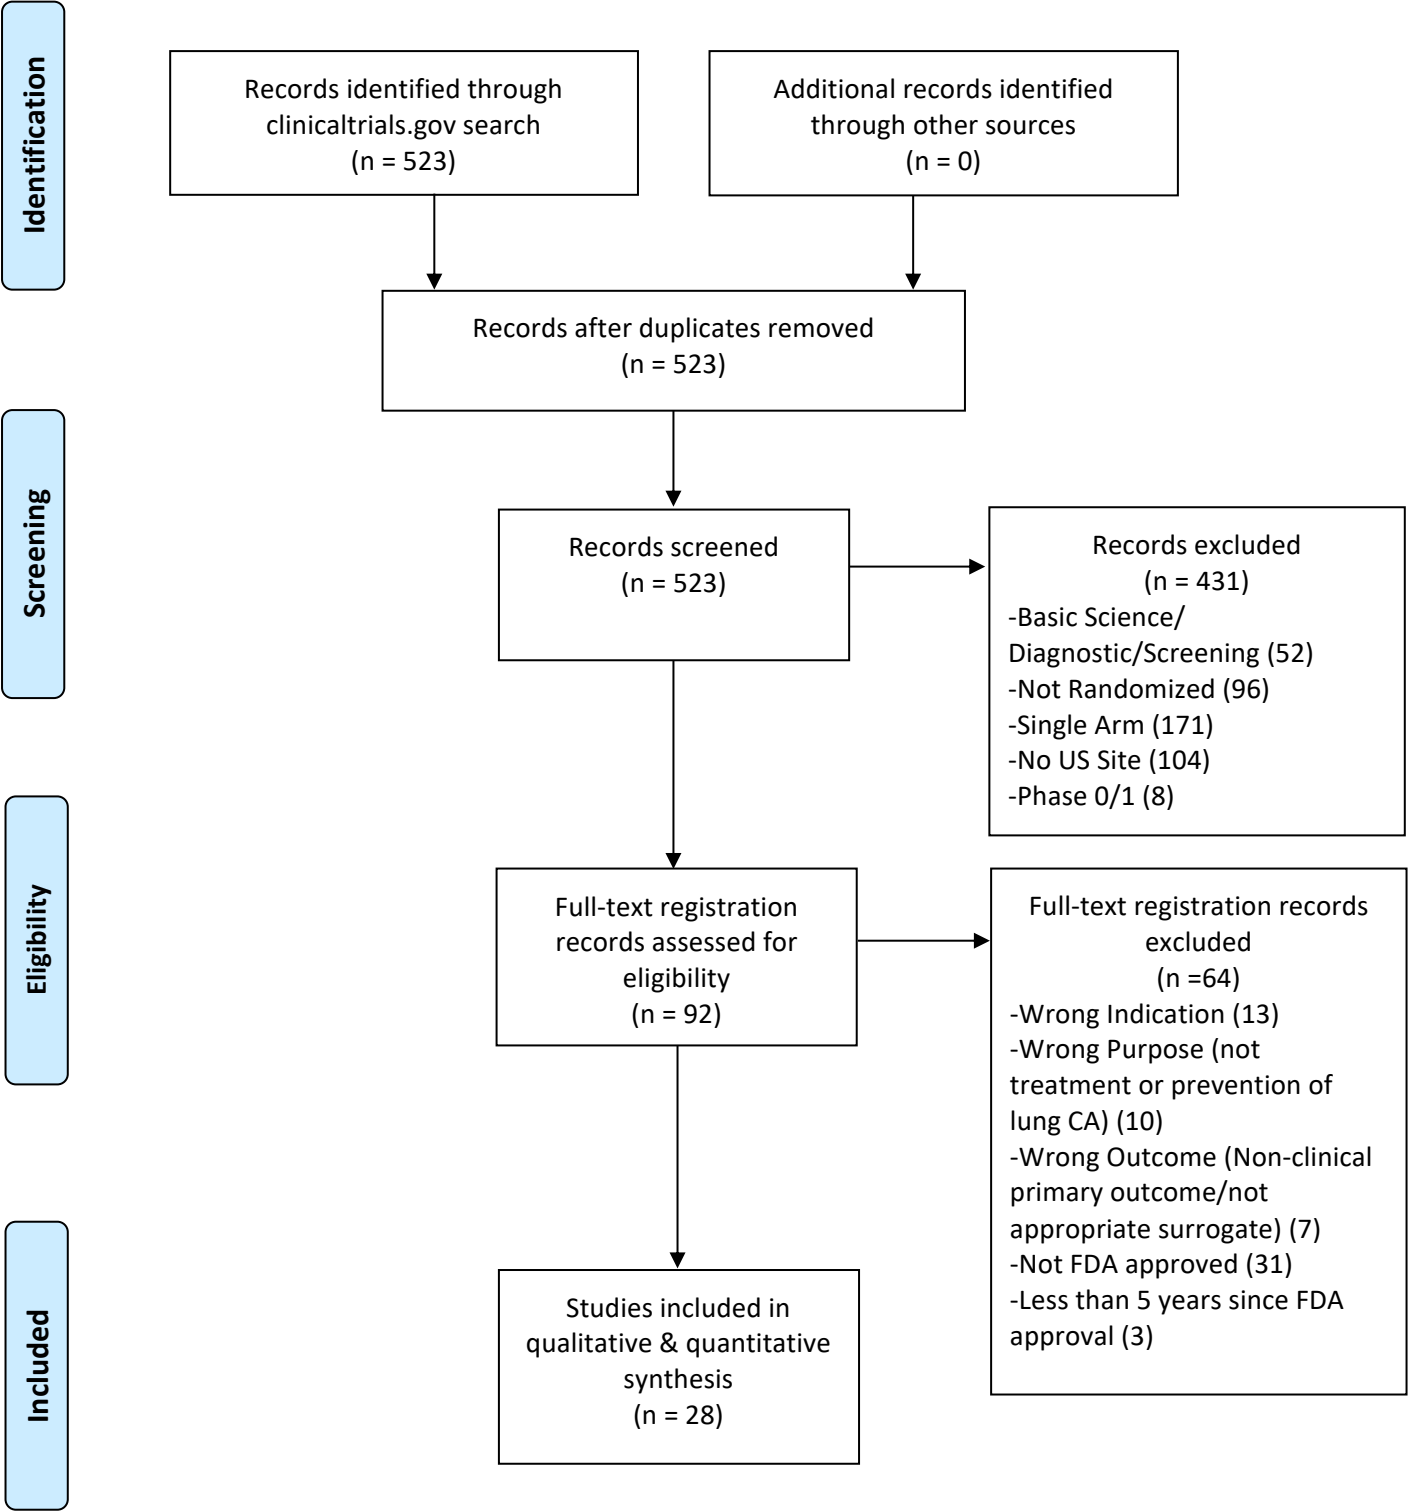

Supplement: supp [file elife-79491-supp-v1.zip]

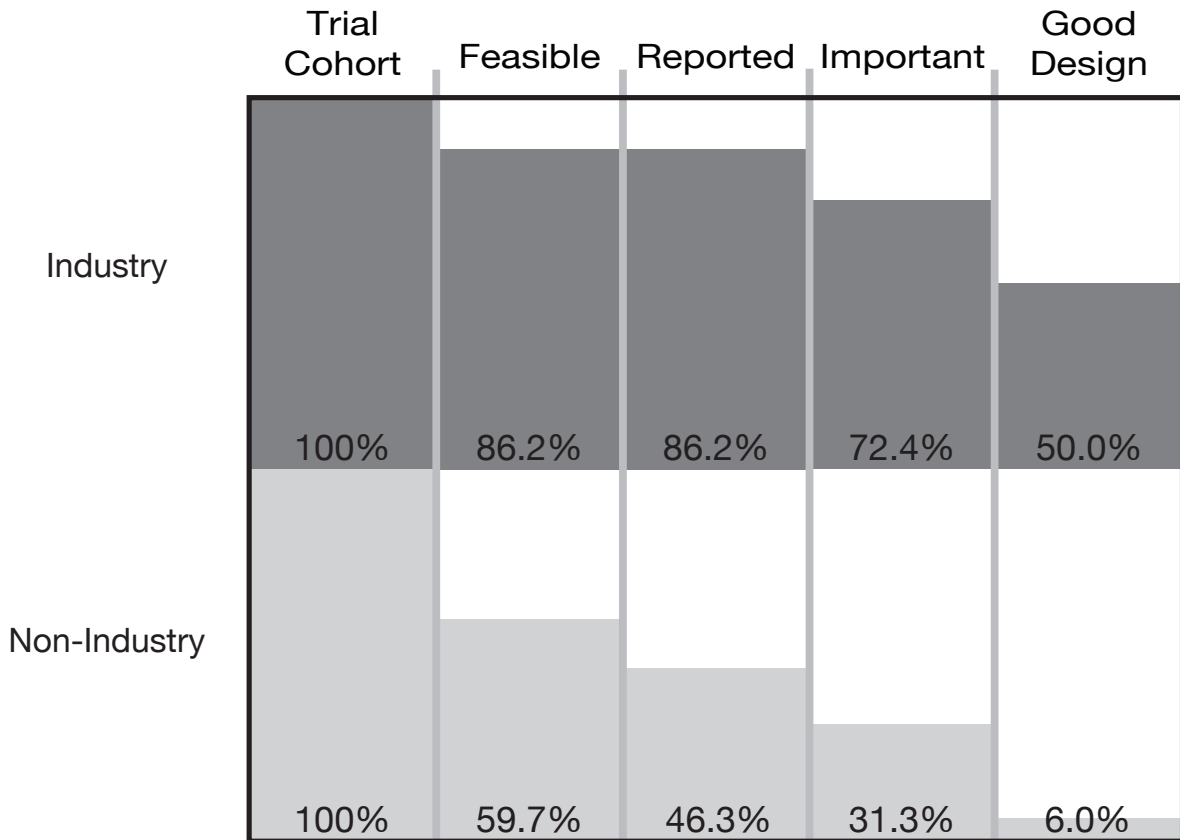

Supplement: supp [file elife-79491-supp-v1.zip › elife_poa_e79491_Figure_2_figure_supplement_1.pdf]

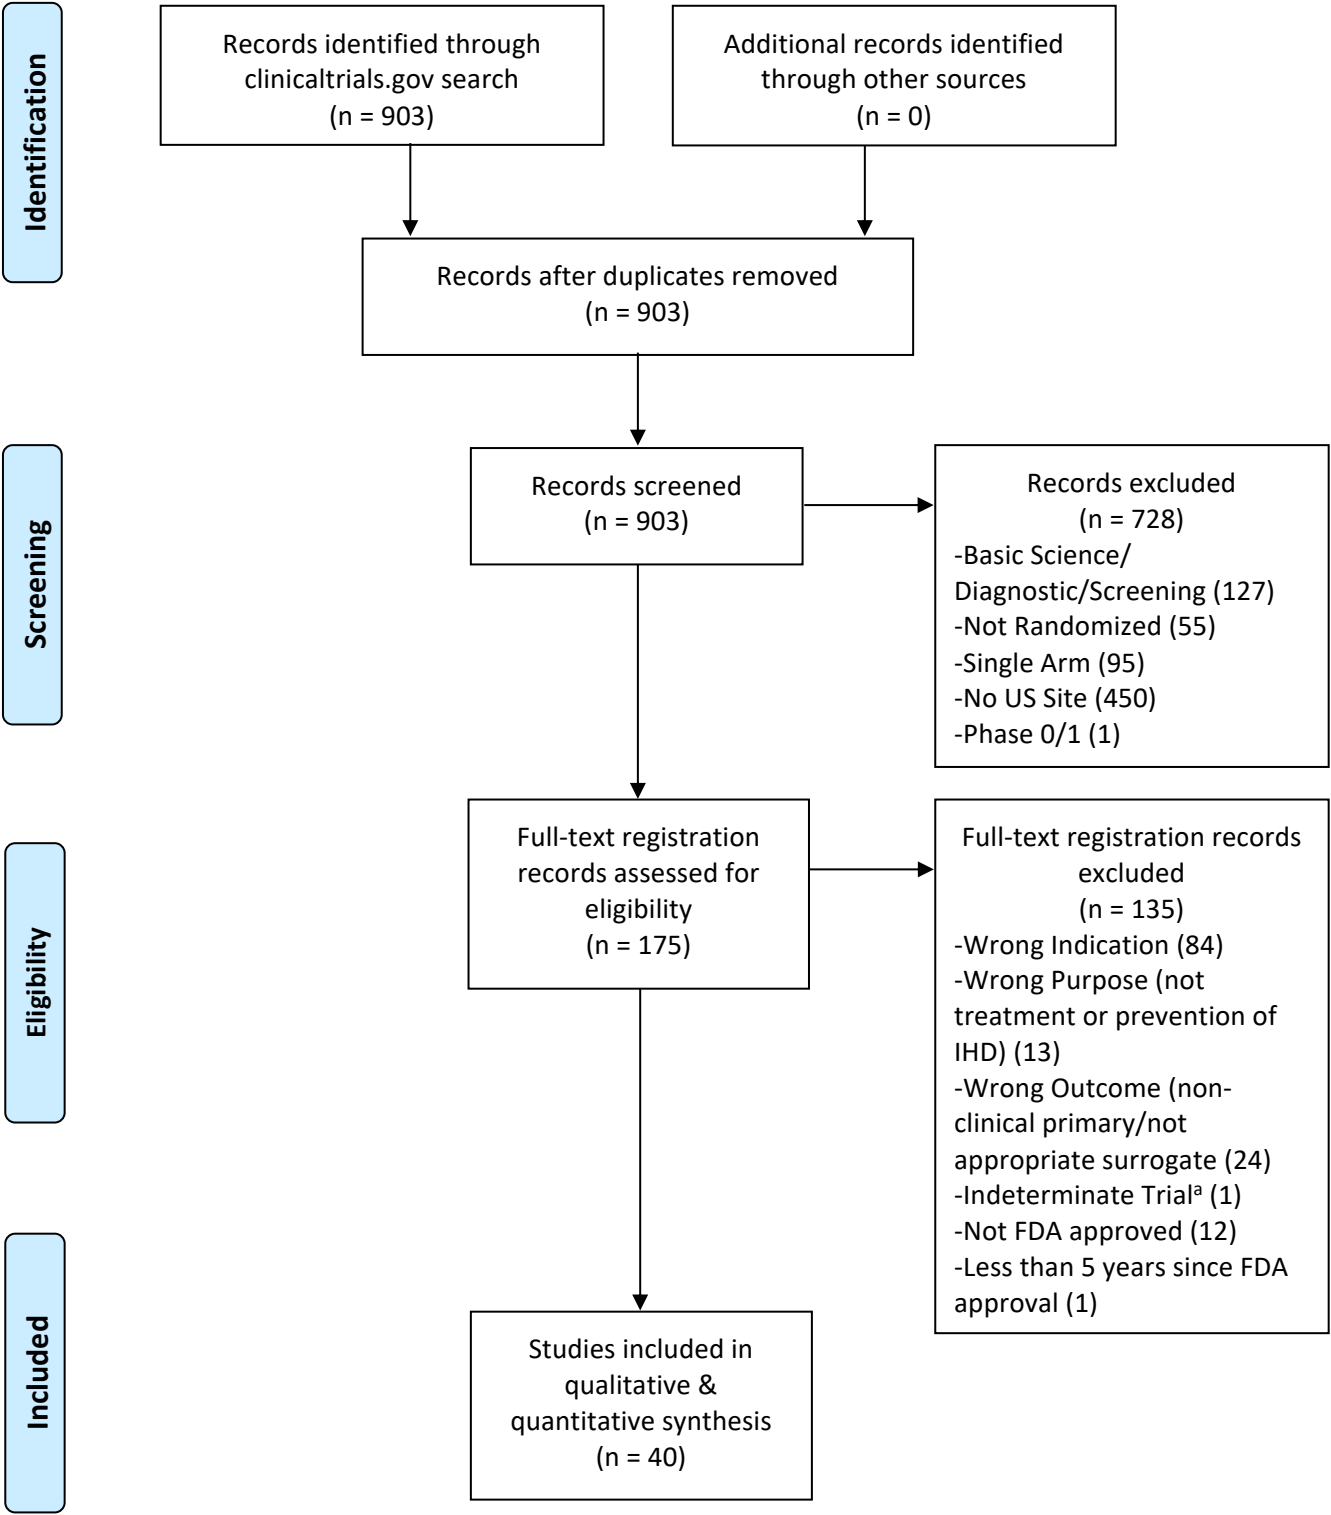

Supplement: supp [file elife-79491-supp-v1.zip › elife_poa_e79491_Figure_3_figure_supplement_1.pdf]
